# Supplementary material
Source: Research Square preprint supplement (doi:10.21203/rs.3.rs-9681418/v1)
Supplement: Supplementary file 1 [file 5c6a25dff4f89207f3f0b205.xlsx]

## Sheet: Sheet1
	Loamysand	Sandyloam	Sand	Sandy clay loam					Pit	Pour flush	WC
	26	42	3	4					3	9	6
	4	5	5	13					24	1	87
	2	17	15	4					35	8	80
	3	1							2	5	35
	11	3							28	4	3
	10	2							2	7	6
	12	4							2	4
	88	46							2				12.1429
		20							15
		4							4
		3							7
		7							1
		1							4					19.987
		25							5
		6							1
		20							4
		80							2
		3							7
		100							1
		2							13
		13							3
		4							5
Sum	156	408	23	21					170	38	217
Mean	19.5	18.5455	7.66667	7					7.72727	5.42857	36.1667
SDEV	28.7154	26.5397	6.4291	5.19615					9.51781	2.76026	38.5405
MIN	2	1	3	4					1	1	3
MAX	88	100	15	13					35	9	87
