# Supplementary material
Source: Research Square preprint supplement (doi:10.21203/rs.3.rs-9681418/v1)
Supplement: Supplementary file 1 [file afffbe1caa9420e5eb6bec84.docx]

**DE-IMAGE LABORATORY SERVICES**

**Opposite Headquarters 2 Division,**

**Nigeria Army, Odogbo Barrack**

**OJOO-IBADAN**

Name: Aderemi

Sample type: Soil

| S/N | pH | S/N | pH |
| --- | --- | --- | --- |
| 1 | 7.47 | 34 | 5.23 |
| 2 | 7.92 | 35 | 6.14 |
| 3 | 7.96 | 36 | 7.12 |
| 4 | 8.00 | 37 | 8.41 |
| 5 | 7.63 | 38 | 8.00 |
| 6 | 8.14 | 39 | 5.76 |
| 7 | 8.15 | 40 | 6.98 |
| 8 | 7.51 | 41 | 5.77 |
| 9. | 7.50 | 42 | 6.98 |
| 10 | 7.91 | 43 | 7.15 |
| 11 | 7.15 | 44 | 6.32 |
| 12 | 7.74 | 45 | 6.02 |
| 13 | 8.35 | 46 | 7.03 |
| 14 | 7.80 | 47 | 5.79 |
| 15 | 8.10 | 48 | 8.00 |
| 16 | 7.67 | 49 | 7.83 |
| 17 | 7.66 | 50 | 7.12 |
| 18 | 8.03 | 51 | 7.94 |
| 19 | 8.29 | 52 | 8.19 |
| 20 | 7.62 | 53 | 7.22 |
| 21 | 7.65 | 54 | 7.43 |
| 22 | 7.85 | 55 | 6.65 |
| 23 | 7.74 | 56 | 7.60 |
| 24 | 8.13 | 57 | 7.89 |
| 25 | 6.51 | 58 | 7.26 |
| 26 | 5.68 | 59 | 7.85 |
| 27 | 6.79 | 60 | 7.41 |
| 28 | 7.88 | 61 | 8.45 |
| 29 | 4.80 | 62 | 7.89 |
| 30 | 4.17 | 63 | 6.90 |
| 31 | 6.86 | 64 | 7.25 |
| 32 | 9.00 | 65 | 7.38 |
| 33 | 4.89 | 66 | 7.85 |
| 67 | 7.60 | 112 | 7.92 |
| 68 | 7.17 | 113 | 7.88 |
| 69 | 8.20 | 114 | 7.78 |
| 70 | 7.97 | 115 | 7.19 |
| 71 | 7.95 | 116 | 8.00 |
| 72 | 7.73 | 117 | 7.26 |
| 73 | 7.82 | 118 | 6.92 |
| 74 | 7.57 | 119 | 7.54 |
| 75 | 7.10 | 120 | 7.95 |
| 76 | 6.99 | 121 | 8.22 |
| 77 | 5.03 | 122 | 8.05 |
| 78 | 4.98 | 123 | 6.97 |
| 79 | 7.00 | 124 | 8.28 |
| 80 | 8.36 | 125 | 7.34 |
| 81 | 7.82 | 126 | 7.91 |
| 82 | 4.68 | 127 | 6.05 |
| 83 | 8.04 | 128 | 7.24 |
| 84 | 6.17 | 129 | 6.63 |
| 85 | 6.66 | 130 | 6.95 |
| 86 | 7.24 | 131 | 7.73 |
| 87 | 7.47 | 132 | 6.57 |
| 88 | 4.90 | 133 | 7.25 |
| 89 | 5.66 | 134 | 7.17 |
| 90 | 6.76 | 135 | 8.25 |
| 91 | 8.12 | 136 | 6.68 |
| 92 | 8.18 | 137 | 6.29 |
| 93 | 6.93 | 138 | 7.91 |
| 94 | 7.83 | 139 | 8.03 |
| 95 | 4.45 | 140 | 7.62 |
| 96 | 5.68 | 141 | 6.29 |
| 97 | 8.03 | 142 | 7.45 |
| 98 | 6.54 | 143 | 7.59 |
| 99 | 7.77 | 144 | 8.29 |
| 100 | 7.65 | 145 | 8.50 |
| 101 | `7.50 | 146 | 6.79 |
| 102 | 6.60 | 147 | 6.97 |
| 103 | 6.92 | 148 | 8.82 |
| 104 | 7.37 | 149 | 7.43 |
| 105 | 6.75 | 150 | 7.79 |
| 106 | 7.22 | 151 | 7.07 |
| 107 | 7.55 | 152 | 7.60 |
| 108 | 7.71 | 153 | 7.96 |
| 109 | 7.74 | 154 | 7.30 |
| 110 | 8.52 | 155 | 7.38 |
| 111 | 6.86 | 156 | 8.14 |
| 157 | 8.26 |  |  |
| 158 | 7.66 |  |  |
| 159 | 8.14 |  |  |
| 160 | 8.31 |  |  |
| 161 | 8.19 |  |  |
| 162 | 8.03 |  |  |
| 163 | 8.31 |  |  |
| 164 | 9.90 |  |  |
| 165 | 8.18 |  |  |
| 166 | 8.11 |  |  |
| 167 | 7.95 |  |  |
| 168 | 7.67 |  |  |
| 169 | 8.20 |  |  |
| 170 | 7.79 |  |  |
| 171 | 7.07 |  |  |
| 172 | 8.15 |  |  |
| 173 | 7.24 |  |  |
| 174 | 7.68 |  |  |
| 175 | 8.16 |  |  |
| 176 | 7.53 |  |  |
| 177 | 7.02 |  |  |
| 178 | 6.29 |  |  |
| 179 | 8.43 |  |  |
| 180 | 6.57 |  |  |
| 181 | 5.60 |  |  |
| 182 | 7.43 |  |  |
| 183 | 7.70 |  |  |
| 184 | 8.61 |  |  |
| 185 | 7.42 |  |  |
| 186 | 8.41 |  |  |
| 187 | 8.13 |  |  |
| 188 | 8.11 |  |  |
| 189 | 7.59 |  |  |
| 190 | 7.76 |  |  |
| 191 | 8.24 |  |  |
| 192 | 7.79 |  |  |
| 193 | 4.43 |  |  |
| 194 | 5.77 |  |  |
| 195 | 6.15 |  |  |
| 196 | 6.67 |  |  |
| 197 | 6.87 |  |  |
| 198 | 7.77 |  |  |
| 199 | 7.04 |  |  |
| 200 | 7.09 |  |  |
|  |  |  |  |
