# Supplementary material
Source: Research Square preprint supplement (doi:10.21203/rs.3.rs-9681418/v1)
Supplement: Supplementary file 2 [file 5caf62f61cbac08bbf1c1fc4.xlsx]

## Sheet: Sheet1
	Ascaris	Hookworm	Toxocara	Trichuris	Capillaria	Larvae
	1	2	2	1	1	3
	3	2	2	2	1	8
	30	4	1	1	1	1
	3	1	10	2	1	2
	2	4	1	5	1	10
	1	1	4	1	1	1
	1	1	1	1	1	1
	1	1	1	4		2
	1	1	5	1		1
	10	3	20	2		1
	17	6	15	1		3
	84	3	3	13
	60	20		5
	25	2		3
	40	5		10
	10	25
	2	2
	2	1
	30	1
	2	12
	4	2
	1	2
	18	1
	1	3
	2	1
	2	2
	12	1
	20	4
	50	3
	2	4
	10	1						13.496
	3	2
	3	1					7.62264
	10	8
	58	1
		10
		20
		4
SUM	521	167	65	52	7	33
MEAN	14.8857	4.39474	5.41667	3.46667	1	3
SD	20.6038	5.74475	6.28792	3.60291	0	3.09839
MIN	1	1	1	1	1	1
MAX	84	25	20	13	1	10
