# Supplementary material
Source: Research Square preprint supplement (doi:10.21203/rs.3.rs-9681418/v1)
Supplement: Supplementary file 3 [file 7df5aae1bb64e4d418dca083.xlsx]

## Sheet: Sheet1
	Loamysand	Sandyloam	Sand	Sandy clay loam					Pit	Pour flush	Wc
	6	3	24						100		42
	87	80	35						12		26
	2	7	28						2		5
	9	3	2								17
	2	4	4								1
	2	7	5								3
	15	1	1								2
	1	5	35								4
	8	6	4								46
	5		3								4
	1										4
	4										3
	7										20
	2										2
	4										4
	13										3
											7
											1
19.987											25
											5
											6
											13
											20
											80
											3
											15			24.706
											11
											3
											4		16.8889
											10
											13
											88
											4
SUM	168	116	141						114		494
MAEN	10.5	12.8889	14.1						38		14.9697
SD	20.8231	25.246	14.5025						53.9259		20.9829
MIN	1	1	1						2		1
MAX	87	80	35						100		88
