# Supplementary material
Source: Research Square preprint supplement (doi:10.21203/rs.3.rs-9681418/v1)
Supplement: Supplementary file 4 [file 87aa172330bb6f31d92054d8.xlsx]

## Sheet: Sheet1
	Intensity	pH
	75	7.47		0.000372842
	5	7.92
	3	7.96
	2	8
	5	7.63
	7	8.14
	2	8.15
	55	7.51
	28	7.5
	0	7.91
	9	7.15
	44	7.74
	6	8.35
	3	7.8
	4	8.1
	8	7.67
	3	7.66
	3	8.03
	0	8.29
	14	7.62
	3	7.65
	230	7.85
	11	7.74
	0	8.13
	30	6.51
	0	5.68
	1	6.79
	73	7.88
	0	4.8
	0	4.17
	12	6.86
	4	9
	15	4.89
	16	5.23
	2	6.14
	1	7.12
	11	8.41
	1	8
	12	5.76
	28	6.98
	1	5.77
	29	6.98
	0	7.15
	1	6.32
	5	6.02
	21	7.03
	1	5.79
	1	8
	2	7.83
	1	7.12
	15	7.94
	0	8.19
	14	7.22
	0	7.43
	1	6.65
	3	7.6
	1	7.89
	28	7.26
	25	7.85
	0	7.41
	1	8.45
	0	7.89
	3	6.9
	0	7.25
	0	7.38
	4	7.85
	17	7.6
	10	7.17
	3	8.2
	3	7.97
	38	7.95
	2	7.73
	102	7.82
	2	7.57
	2	7.1
	2	6.99
	14	5.03
	5	4.98
	83	7
	11	8.36
	1	7.82
	4	4.68
	3	8.04
	3	6.17
	30	6.66
	12	7.24
	11	7.47
	1	4.9
	40	5.66
	44	6.76
	2	8.12
	0	8.18
	10	6.93
	17	7.83
	3	4.45
	2	5.68
	5	8.03
	4	6.54
	7	7.77
	1	7.65
	3	7.5
	24	6.6
	35	6.92
	6	7.37
	87	6.75
	0	7.22
	2	7.55
	28	7.71
	9	7.74
	0	8.52
	2	6.86
	2	7.92
	2	7.88
	15	7.78
	4	7.19
	1	8
	0	7.26
	8	6.92
	80	7.54
	0	7.95
	0	8.22
	5	8.05
	7	6.97
	1	8.28
	0	7.34
	0	7.91
	0	6.05
	35	7.24
	0	6.63
	3	6.95
	0	7.73
	4	6.57
	4	7.25
	5	7.17
	0	8.25
	1	6.68
	4	6.29
	7	7.91
	2	8.03
	0	7.62
	0	6.29
	7	7.45
	4	7.59
	1	8.29
	0	8.5
	0	6.79
	13	6.97
	3	8.82
	5	7.43
	6	7.79
	42	7.07
	26	7.6
	5	7.96
	17	7.3
	1	7.38
	3	8.14
	2	8.26
	0	7.66
	4	8.14
	0	8.31
	0	8.19
	0	8.03
	46	8.31
	4	9.9
	4	8.18
	3	8.11
	20	7.95
	2	7.67
	0	8.2
	4	7.79
	3	7.07
	7	8.15
	1	7.24
	0	7.68
	0	8.16
	25	7.53
	5	7.02
	6	6.29
	13	8.43
	20	6.57
	0	5.6
	80	7.43
	3	7.7
	15	8.61
	11	7.42
	0	8.41
	3	8.13
	0	8.11
	0	7.59
	4	7.76
	0	8.24
	100	7.79
	0	4.43
	10	5.77
	2	6.15													e
	12	6.67
	13	6.87
	88	7.77
	4	7.04
	0	7.09
SUM	2410
