# Supplementary material
Source: Research Square preprint supplement (doi:10.21203/rs.3.rs-9681418/v1)
Supplement: Supplementary file 5 [file 8c389e1ea6ac2d16f4cb14f7.xlsx]

## Sheet: Sheet1
	Ascaris	Hookworm	Toxocara	Trichuris	Capillaria	Larvae
	2	1	1	3	2	1
	2	3	2	6	2	4
	10	28	3	3	1	2
	10	7	10	2		2
	25	20	9	4		1
	60	2	6	2		12
	7	1	1
	1	30	2
	4	3
	2	1
	2	2
		1							11.1104
		1
		1						6.78571
SUM	125	101	34	20	5	22
MEAN	11.3636	7.21429	4.25	3.33333	1.66667	3.66667
SDEV	17.5686	10.5114	3.61544	1.50555	0.57735	4.2269
MIN	1	1	1	2	1	1
MAX	60	30	10	6	2	12
