# Supplementary material
Source: Research Square preprint supplement (doi:10.21203/rs.3.rs-9681418/v1)
Supplement: Supplementary file 7 [file b231fc12ab7a7972ce54eb69.xlsx]

## Sheet: Sheet1
	Loamysand	Sandyloam	Sand	Sandy clay loam		Pit	Pour flush	water closet							Ilare II	Ilare III	Akarabata	Iremo I
	75	3	7	11		75	5	5							75	15	3	42
	5	2	28	1		2	3	2							5	14	24	26
	2	55	9	3		7	12	6							3	1	35	5
	5	4	44	2		55	16	3							2	3	6	17
	6	14	3	4		28	28	4							5	1	87	1
	30	11	8	13		9	38	3							7	28	2	3
	1	28	3	4		44	83	3							2	25	28	2
	74	29	3			8	3	30							55	1	9	4
	16	1	3			3	11	4							28	3	2	46
	2	14	230			14	1	2							9	4	2	4
	1	28	12			230	10	1			15.3355				44	17	2	4
	12	17	4			11	3	1							6	10	15	3
	1	3	15			1	4	2							3	3	4	20
	5	2	1			74	9	1							4	3	1	2
	21	5	1			15	1	2							8	38	8	4
	1	83	10			1	8	14							3	2	80	3
	2	4	38			11	5	17				27.1289			3	102	5	7
	15	30	2			12	4	6							14	2	7	1
	1	12	102			1	7	87							3	2	1	25
	25	1	17			29	4	80							230	2	35	5
	1	10	2			1		35							11	14	3	6
	3	4	24			5		3							30	5	4	13
	4	7	35			21		6							1	83	4	20
	2	1	28			15		42							73	11	5	80
	2	3	2			14		26							12	1	1	3
	14	80	4			1		5							4	4	4	15
	11	7	5			3		17							15	3	7	11
	1	3	1			1		1							16	3	2	3
	3	4	35			28		3							2	30	7	4
	3	7	4			25		2							1	12	4	100
	11	1	3			1		4							11	11	1	10
	40	5	3			3		46							1	1	13	2
	44	6	5			4		4							12	40	3	12
	3	42	15			17		4							28	44	5	13
	5	5				10		3							1	2	6	88
	6	17				3		20							29	10		4
	87	1				102		2							1	17
	2	3				2		4							5	3
	9	2				2		3							21	2
	2	4				2		7							1	5
	2	46				5		1							1	4
	15	20				11		25							2	7
	1	4				1		5							1	1
	8	3				4		6						SUM	788	589	425	608
	5	7				3		13						MEAN	35.8182	26.7727	23.6111	32.8649
	1	1				30		20						SD	37.7137	21.0074	19.987	24.706
	4	25				12		80
	7	6				44		3
TOTAL SD	2	20				2		15
27.1282	4	80				10		11
	13	3				2		3
	26	100				5		4
	4	2				7		10
	2	13				1		13
TT MEAN	3	4				3		88						SUM	2410
15.4487	11	3				24		4
	10					35
	12					2
	88					28
						2
						2
						2
						15
						4
						7
						1
						4
						5
						1
						4
						2
						7
						1
						13
						3
						5
						2
						12
						100
SUM	771	895	706	38		1311	255	811
MEAN	13.0678	16.2182	20.7647	5.42857		16.5949	12.75	14.4821
SD	20.7147	22.9929	41.9098	4.64963		31.9645	18.9289	21.9661
MIN	1	1	1	1		1	1	1
MAX	88	100	230	13		230	83	88
