# Supplementary material
Source: Research Square preprint supplement (doi:10.21203/rs.3.rs-9681418/v1)
Supplement: Supplementary file 8 [file b95849f763bd934d04f6355b.xlsx]

## Sheet: Sheet1
	Loamysand	Sandyloam	Sand	Sandyclayloam					Pit	Pour flush	WC
	15	14	10	1					15	38	2
	1	28	38	3					14	83	14
	25	17	2	2					1	3	17
	1	3	102						3	11
	3	2	17						1	1
	4	5	2						28	40
	2	83							25	3
	2	4							1	4
	14	30							3
	11	12							4
	1	1							17
	3	10							10
	3	4							3				13.6977
	11	7							3
	40	1							102
	44	3							2
	3								2
	5								2				21.0074
									5
									11
									1
									4
									3
									30
									12
									44
									2
									10
									2
									5
									7
SUM	188	224	171	6					1
MEAN	10.4444	14	28.5	2				SUM	373	183	33
SD	13.1696	20.4874	38.3966	1				MEAN	11.6562	22.875	11
MIN	1	1	2	1				SD	19.4084	29.0391	7.93725
MAX	44	83	102	3
