# Supplementary material
Source: Research Square preprint supplement (doi:10.21203/rs.3.rs-9681418/v1)
Supplement: Supplementary file 9 [file ccfb513be1ff636999f5287c.xlsx]

## Sheet: Sheet1
	Ascaris	Hookworms	Toxocara	Trichuris	Capillaria	Larvae
	42	20	11	2	2	2
	3	2	2	1	6	15
	44	2	1	1	2	10
	20	10	3	1	1	1
	2	8	3	10	1	15
	22	4	3	1	1	3
	1	11	50	5	1	3
	1	1	3	1	1	5
	10	1	6	6	2	2
	180	2	2	1	1	4
	8	1	1	5	4	3
	45	18	1	1		2
	15	12	1	1		2
	1	6	4	1		1
	10	1	2	2		4
	17	3	1	5		4
	2	2	27	25		1
	21	5	2	15		1
	8	4	2	4		1
	6	3	1	2		1
	3	2	2			2
	28	3	20			1
	15	10				1
	2	2				1
	13	22
	3	1
	80	2
	1	1
	4	1
	2	1
	2	2
	29	3
	8	1
	39	1
	1	2
	10	24
	1	2
	1	1
	2	2
	1	3
	3	1
	10	1
	3	1
	1	1								18.5535
	1	13
	4	1
	2	10
	2	2							8.56863
	70	1
	11
	8
SUM	818	233	148	90	22	85
MEAN	16.0392	4.7551	6.72727	4.5	2	3.54167
SD	29.1945	5.9109	11.6953	6.03934	1.61245	4.05376
MIN	1	1	1	1	1	1
MAX	180	24	50	25	6	15
