# Supplementary material
Source: Research Square preprint supplement (doi:10.21203/rs.3.rs-9681418/v1)
Supplement: Supplementary file 10 [file d936a353bfa0035437910a09.xlsx]

## Sheet: Sheet1
	Ascaris	Hookworm	Toxocara	Trichuris	Capillaria	Larvae
	42	20	11	1	2	2
	2	1	1	2	2	15
	2	2	2	1	6	10
	3	2	2	1	1	1
	44	2	1	2	2	1
	20	2	3	1	1	3
	2	10	3	10	1	4
	22	8	2	3	1	15
	1	4	3	1	1	8
	1	11	50	5	1	2
	1	4	3	1	1	3
	10	1	2	6	2	3
	3	4	6	1	2	5
	180	1	2	6	1	2
	8	1	1	1	1	4
	30	1	1	5	4	3
	45	2	1	3	1	2
	10	1	1	1	1	2
	3	18	4	1	1	2
	15	1	3	1	1	1
	10	3	10	2	1	1
	2	12	2	2		4
	1	28	1	5		12
	10	6	27	25		4
	1	1	9	15		1
	17	3	2	4		1
	2	1	2	4		1
	21	1	6	2		1
	1	2	4	2		1
	1	5	10	2		2
	8	4	1	5		1
	6	3	1	1		2
	3	2	1	1		10
	28	3	5	4		1
	15	10	2	1		1
	2	2	1	2		2
	13	7	2	1		1
	3	22	4	13		2
	25	1	1	5		1
	1	3	1	3		1
	80	20	5	10		3
	1	2	20			1
	10	1	15
	60	1	3
	4	1	20
	2	2
	2	2
	29	1
	8	30
	7	3
	39	1
	1	1
	10	2
	17	3
	1	24
	1	6
	1	3
	2	2
	1	1
	3	2
	10	1
	84	2
	60	20
	4	1
	3	2
	1	1
	25	3
	2	1
	1	1
	4	1
	2	1
	2	1
	2	13
	40	1
	10	5
	2	25
	2	2
	30	1
	2	1
	4	12
	1	2
	18	2
	1	1
	2	3
	2	1
	12	2
	20	1
	50	4
	2	3
	10	4
	3	1
	3	2
	70	1
	11	8					15.9128
	10	1
	58	10
		10						7.92763
		2
		1
		20
		4
SUM	1456	501	257	162	34	142
MEAN	15.1667	4.9604	5.71111	3.95122	1.61905	3.38095
SDEV	25.1909	6.64819	8.87443	4.73789	1.24403	3.72174
GRANDSUM==2405
