# Supplementary material
Source: Research Square preprint supplement (doi:10.21203/rs.3.rs-9681418/v1)
Supplement: Supplementary file 11 [file f7ad45642bfb2921e7b280f9.xlsx]

## Sheet: Sheet1
	Loamysand	Sandyloam	sand	Sandy clay loam				Pit	Pour flush	WC				Ascaris	Hookworm	Toxocara	Trichuris	Capilaria
	75	3	7	11				75	5	5				42	20	11	1	2
	5	2	28					2	3	2				2	1	1	2	2
	2	55	9					7	12	6				2	2	2	1	1
	5	4	44					55	16	3				3	2	2	1	2
	6	14	3					28	28	4				44	2	1	2	1
	30	11	8					9		3				20	2	3	1	1
	1	28	3					44		3				2	10	3	10	1
	74	29	3					8		30				22	8	2	3
	16	1	3					3		4				1	4	3	1
	2		230					14		2				1	11	50
	1		12					230		1				1	4	3
	12		4					11		1				10	1	2
	1		15					1		2				3	4	6
	5		1					74		1				180	1
	21		1					15				18.7619		8	1
	1							1						30	1
	2							11						45	2
								12				38.1076		10	1
								1						3	18
								29						15	1
								1						10	3
								5						2	12
								21						1	28
SUM	259	147	371	11				657	64	67				10	6
MEAN	15.2353	16.3333	24.7333	11				28.5652	12.8	4.78571				1	1
SDEV	23.7474	18.0139	57.9784	#DIV/0!				49.2229	9.98499	7.41286				17	3
														2	1
														21	1
														1
														1
													SUM	510	151	89	22	10
													MEAN	32.9032	10.4138	12.7143	4.4	2.5
													SD	33.5857	6.81686	13.2341	2.92024	0.534522
